# Supplementary material
Source: publisher figshare collection journal article supplement (https://acs.figshare.com/ndownloader/files/25587082)
Supplement: Supplementary file 1 [file 25587082]

# Supporting Information

## Self-assembly fabrication of honeycomb-like magnetic–fluorescent $\text{Fe}_3\text{O}_4$ -QDs nanocomposites for bimodal imaging

*Jincheng Li,<sup>a</sup> Jialei Zhang,<sup>a</sup> Zengchao Guo,<sup>a</sup> Hui Jiang,<sup>a</sup> Haijun Zhang<sup>b\*</sup> and Xuemei Wang<sup>a\*</sup>*

a. State Key Lab of Bioelectronics (Chien-Shiung Wu Laboratory), School of Biological Science and Medical Engineering, Southeast University, Nanjing, 210096, China.

b. Department of Oncology, Zhongda Hospital, School of Medicine, Southeast University, Nanjing, 210009, China.

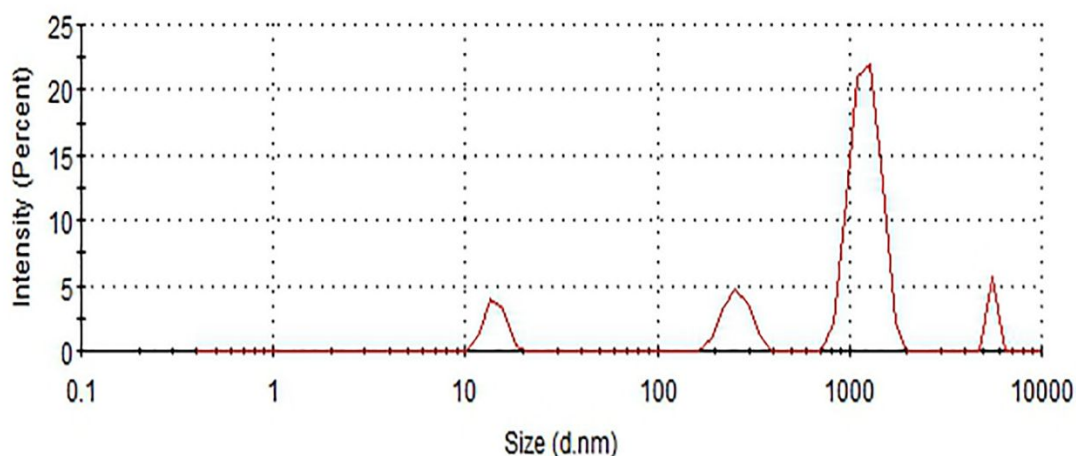

Figure S1. The dynamic light scattering (DLS) size distribution by intensity

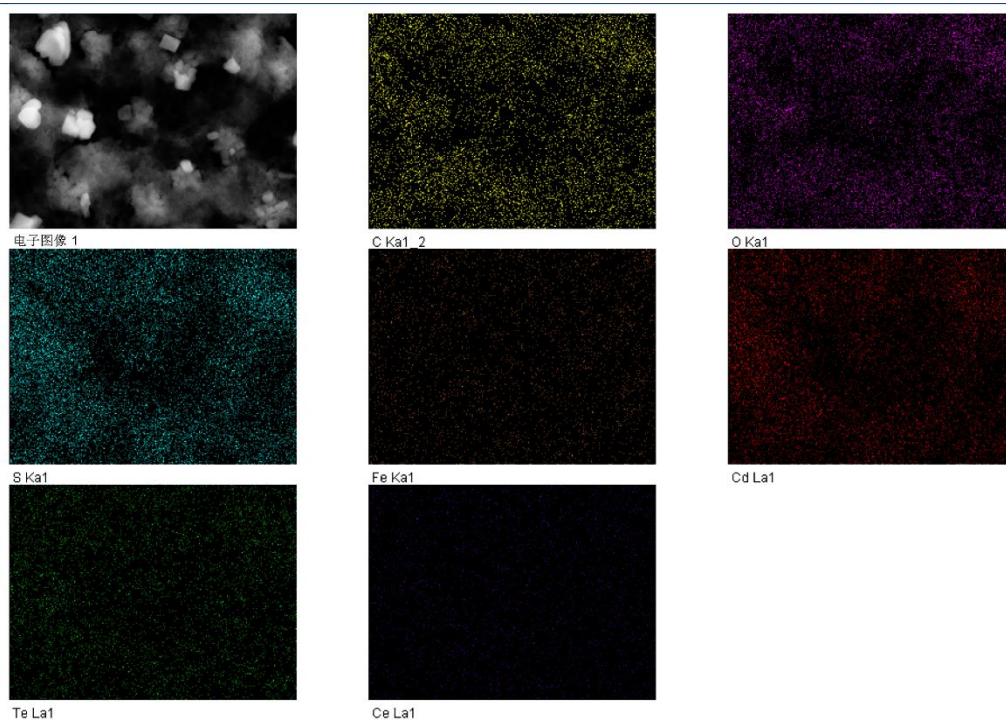

Figure S2. The energy-dispersive X-ray spectroscopy (EDS) element mapping.
